# Supplementary material for: A Novel Role for Bcl-2 in Regulation of Cellular Calcium Extrusion
Source: PubMed Central journal article supplement (PMC3396842; doi:10.1016/j.cub.2012.05.002), 2012-07-10

## Supplemental Information

### A Novel Role for Bcl-2 in Regulation

#### of Cellular Calcium Extrusion

Pawel E. Ferdek, Julia V. Gerasimenko, Shuang Peng, Alexei V. Tepikin, Ole H. Petersen, and Oleg V. Gerasimenko

#### Supplemental Figure Legends

##### Figure S1. Cytosolic Calcium Extrusion Is Substantially Increased in Bcl-2 KO Cells

(A) Average traces (mean value and standard error) of cytosolic calcium responses to 10 $\mu$ M ACh and 10 $\mu$ M thapsigargin in Fluo-4-loaded pancreatic acinar cells isolated from WT (blue trace, n=11) and Bcl-2 KO (red trace, n=23) mice.

(B) Comparison of the average area under the traces of normalized Fluo-4 fluorescence responses recorded between 200s and 400s from (A) (p=0.002). Error bars represent standard errors.

(C) Average traces (mean value and standard errors) of cytosolic calcium responses to 10 $\mu$ M thapsigargin in Fura-2-loaded pancreatic acinar cells isolated from WT (blue trace, n=35) and Bcl-2 KO (red traces, n=27) mice presented as changes in 340/380 nm ratio. Initial increase is cytosolic [Ca<sup>2+</sup>]<sub>i</sub> induced by thapsigargin; this is followed by Ca<sup>2+</sup> extrusion across the plasma membrane. The rate of Ca<sup>2+</sup> extrusion is much faster in Bcl-2 KO cells than in the WT cells.

(D) The graph shows the rate of decrease in Fura-2 340/380 nm ratio is dependent on the temporal ratio values in WT (blue) and Bcl-2 KO (red) pancreatic acinar cells, which corresponds to cytosolic Ca<sup>2+</sup> extrusion. -d(Ratio)/dt values were calculated from average traces depicted in (C).

##### Figure S2. Cytosolic Ca<sup>2+</sup> Extrusion in Pancreatic Acinar Cells Is Mainly Dependent on the PMCA.

(A) Normal (WT) pancreatic acinar cells. Average trace (n=18) showing changes in [Ca<sup>2+</sup>]<sub>i</sub> evoked first by application of thapsigargin in the absence of external Ca<sup>2+</sup> and thereafter by a 300s period of exposure to an external solution containing 5mM Ca<sup>2+</sup>, followed by its removal. Na<sup>+</sup> was present in the external solution throughout the whole experiment.

(B) Normal (WT) pancreatic acinar cells; average trace (n=24). Similar protocol as in (A), but Na<sup>+</sup> in external solution was substituted by NMDG<sup>+</sup> 200 s before exposure to 5mM Ca<sup>2+</sup>. The absence of Na<sup>+</sup> does not affect the rate of Ca<sup>2+</sup> extrusion.

(C) Pancreatic acinar cell from Bcl-2 KO mouse. Typical trace demonstrating changes in [Ca<sup>2+</sup>]<sub>i</sub> evoked by exposure to an external solution containing 5mM Ca<sup>2+</sup> in the constant presence of Na<sup>+</sup> (standard NaHEPES buffer). The ER was emptied beforehand by application of 2 $\mu$ M thapsigargin.

(D) Pancreatic acinar cell from Bcl-2 KO mouse. Typical trace demonstrating changes in [Ca<sup>2+</sup>]<sub>i</sub> evoked by exposure to an external solution containing 5mM Ca<sup>2+</sup> in the absence of Na<sup>+</sup>. The ER was emptied by application of 2 $\mu$ M thapsigargin and thereafter NaHEPES was substituted to NMDG-HEPES. The absence of Na<sup>+</sup> does not affect the rate of Ca<sup>2+</sup> extrusion as compared to (C).

(E) Normal (WT) pancreatic acinar cell. Typical trace demonstrating changes in [Ca<sup>2+</sup>]<sub>i</sub> evoked by exposure to an external solution containing 5 mM Ca<sup>2+</sup> after emptying the ER by application of 2 $\mu$ M thapsigargin. The trace is a control for (F).

(F) Normal (WT) pancreatic acinar cell. Typical trace showing inhibition of cytosolic Ca<sup>2+</sup> extrusion by 1mM La<sup>3+</sup> as compared to (E). [Ca<sup>2+</sup>]<sub>i</sub> was increased by exposure to 5mM Ca<sup>2+</sup> in the external solution after emptying the ER with 2 $\mu$ M Tg.

**Figure S3. Overexpression of Bcl-2 in AR42J Cells Decreases PMCA-dependent Cytosolic Ca<sup>2+</sup> Extrusion across the Plasma Membrane**

(A) Typical trace showing changes in [Ca<sup>2+</sup>]<sub>i</sub> in a control AR42J cell transfected with cytosolic Cameleon D1. The ER store was depleted with 10μM cyclopiazonic acid (CPA) followed by substitution of Na<sup>+</sup> in the external solution to NMDG<sup>+</sup> (in order to provide inhibition of NCX). Elevated [Ca<sup>2+</sup>]<sub>i</sub> decreased towards the baseline values after removal of 10mM Ca<sup>2+</sup> from the external solution.

(B) An AR42J cell overexpressing Bcl-2. Similar protocol as in (A). The rate of Ca<sup>2+</sup> extrusion after removal of 10mM external Ca<sup>2+</sup> is substantially slower than in the control AR42J cell (shown in (A)).

(C) Typical trace showing changes in [Ca<sup>2+</sup>]<sub>i</sub> in a Fura-2-loaded control AR42J cell. The ER store was depleted with 10μM cyclopiazonic acid (CPA); Na<sup>+</sup> was substituted to NMDG<sup>+</sup> in the external solution 50s before the cell was briefly exposed to high (10mM) extracellular Ca<sup>2+</sup>. Elevated [Ca<sup>2+</sup>]<sub>i</sub> decreased towards the baseline values after removal of 10mM Ca<sup>2+</sup> from the external solution.

(D) An AR42J cell overexpressing Bcl-2. Similar protocol as in (C). The rate of Ca<sup>2+</sup> extrusion after removal of 10mM external Ca<sup>2+</sup> is much slower than in the control cell (shown in (A)).

(E) The bar chart compares half times (τ<sub>1/2</sub>) of [Ca<sup>2+</sup>]<sub>i</sub> decrease towards the resting level following removal of external Ca<sup>2+</sup> in Fura-2-loaded control AR42J cells (blue bar, n=44) and in AR42J cells overexpressing Bcl-2 (purple bar, n=127). Typical traces were presented in (C) and (D).

**Figure S4. Localization of Bcl-2 in Pancreatic Acinar Cells and AR42J Cells.**

(A) Coimmunolocalization of the Bcl-2 and the PMCA in a fixed preparation in a cluster of pancreatic acinar cells. The cells were immunostained with antibodies against Bcl-2 (Aa) and the PMCA (Ab); overlaid in (Bc).

(B) (Ba) A section of a pancreatic acinar cell expressing fusion protein Bcl-2-GFP as shown in green. (Bb) The plasma membrane was stained with FM 1-64, which is shown in red. (Bc) Overlay of green and red fluorescence demonstrates partial colocalization (yellow) at the plasma membrane.

(C) Coimmunolocalization of the Bcl-2-GFP and the PMCA in a fixed preparation of AR42J cells. The cells are expressing fusion protein Bcl-2-GFP – shown in green (Ca); and were immunostained with antibodies against the PMCA (red) (Cb); overlaid in (Cc).

# Supplemental Figure 1

**A**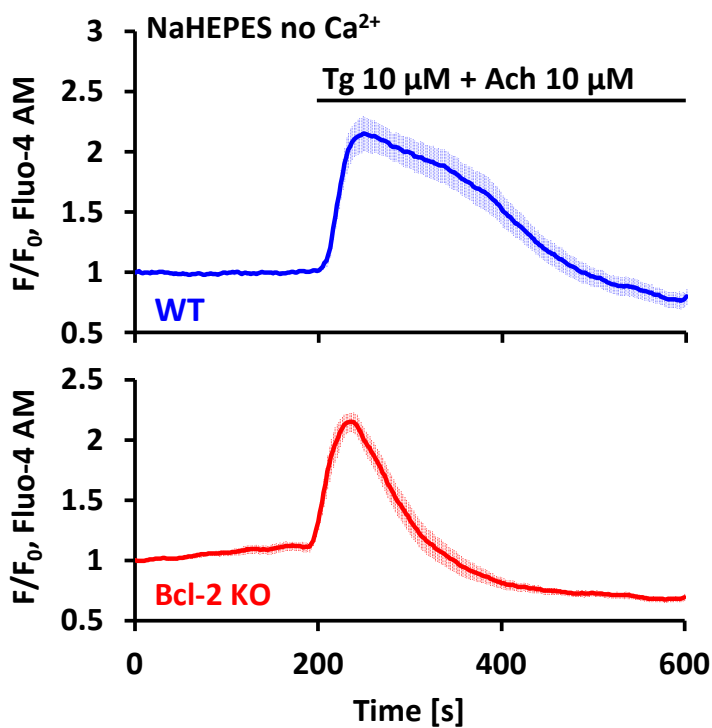**B**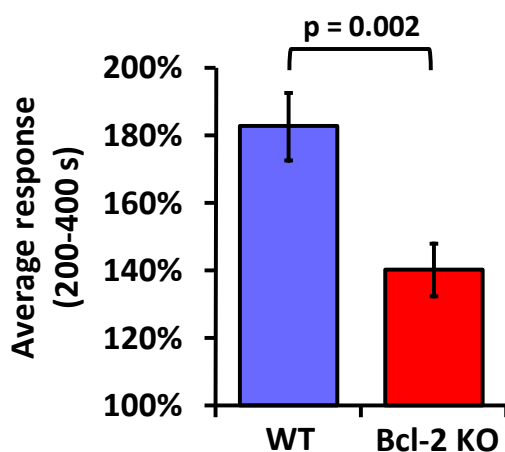**C**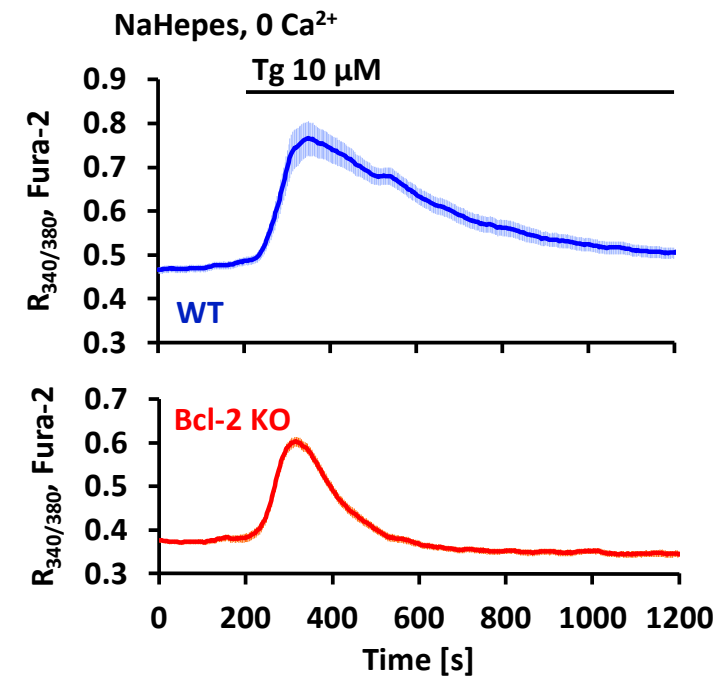**D**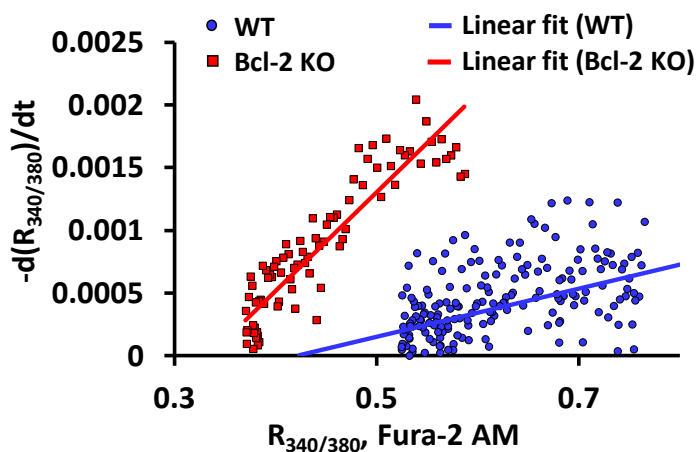

# Supplemental Figure 2

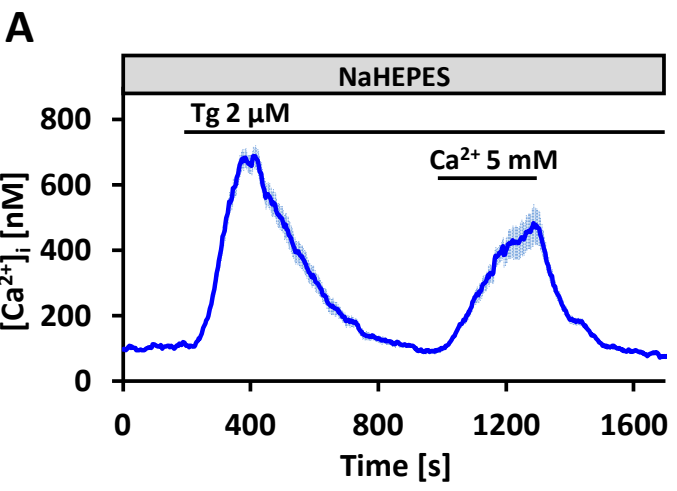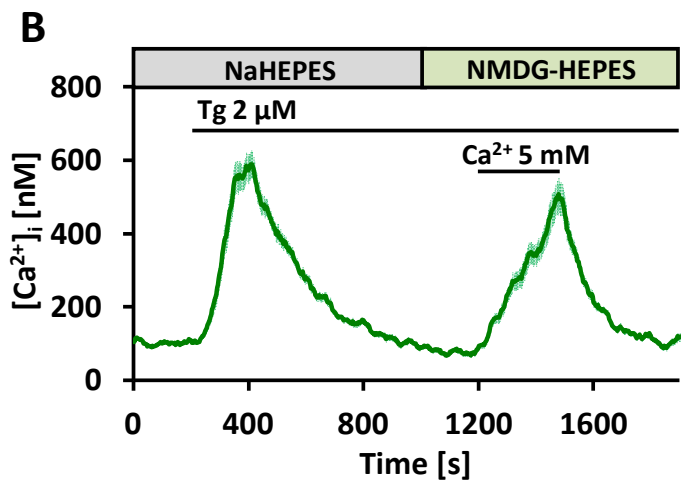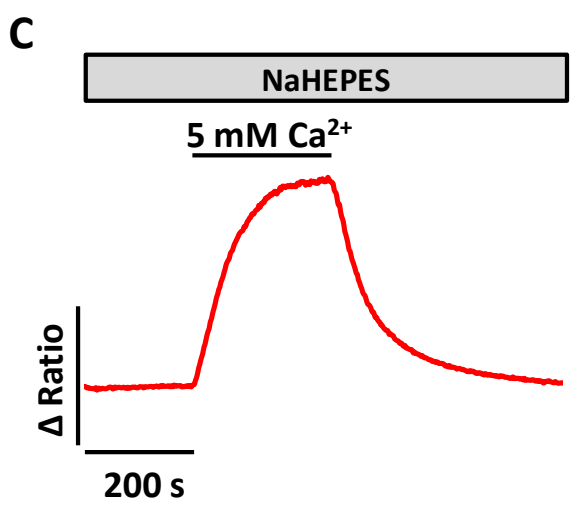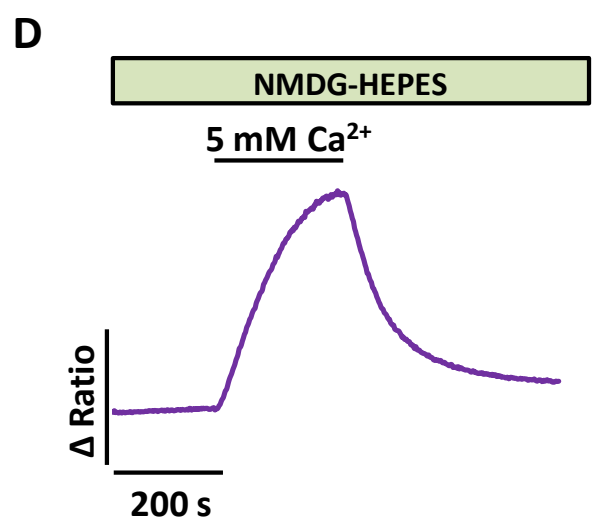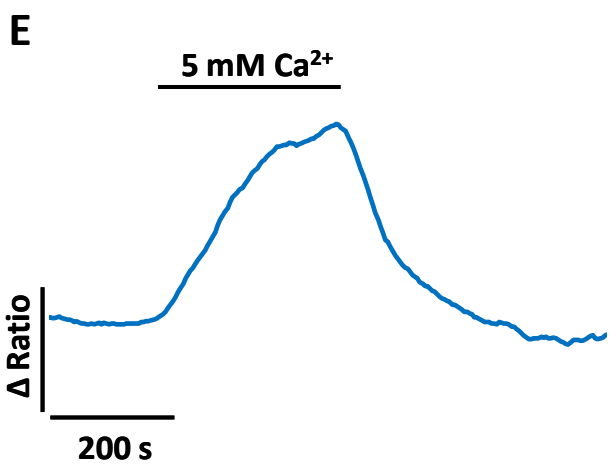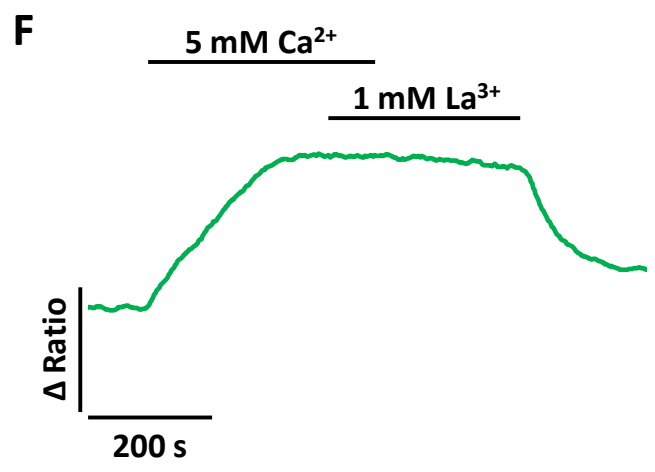

# Supplemental Figure 3

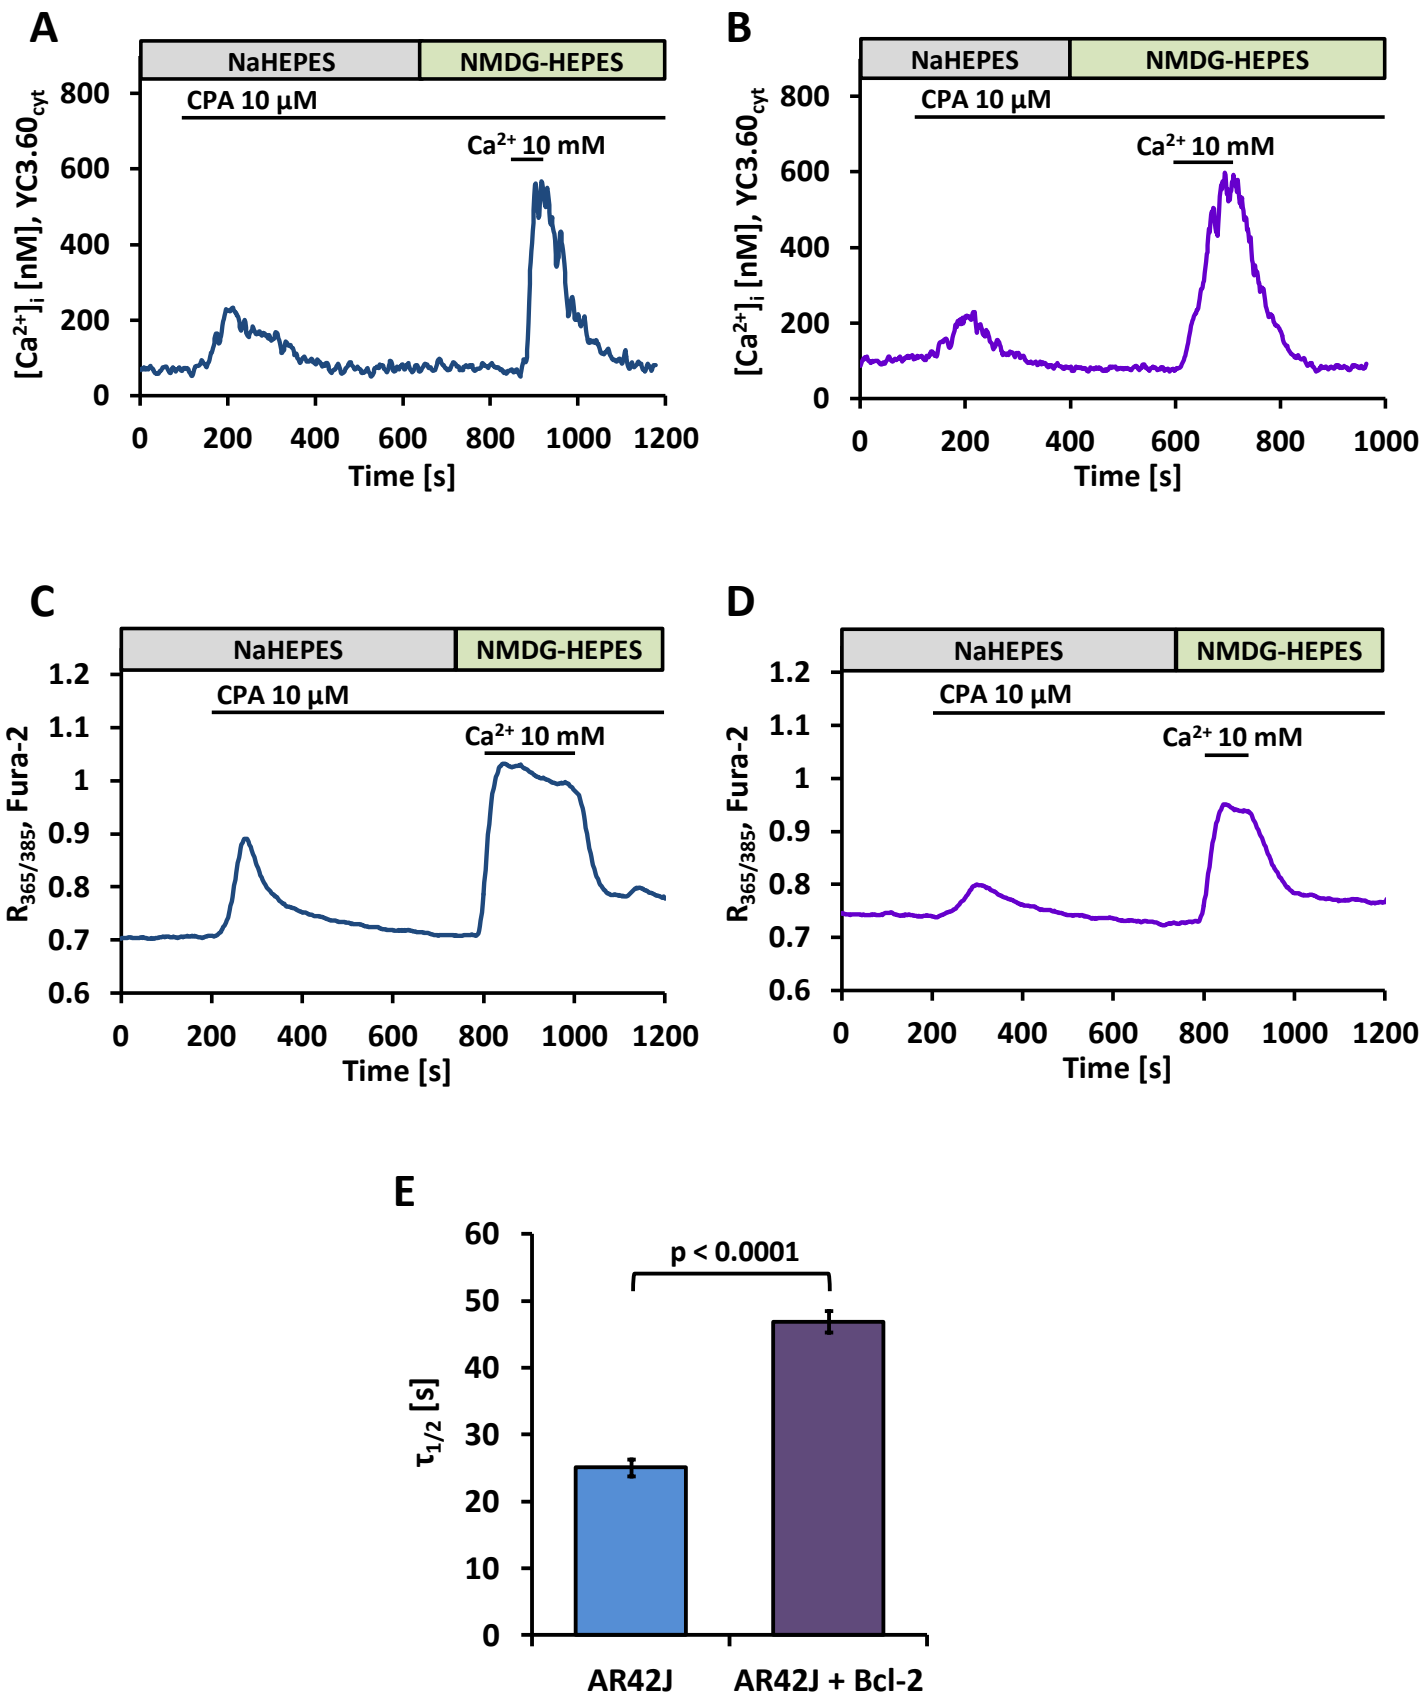

Supplemental Figure 4

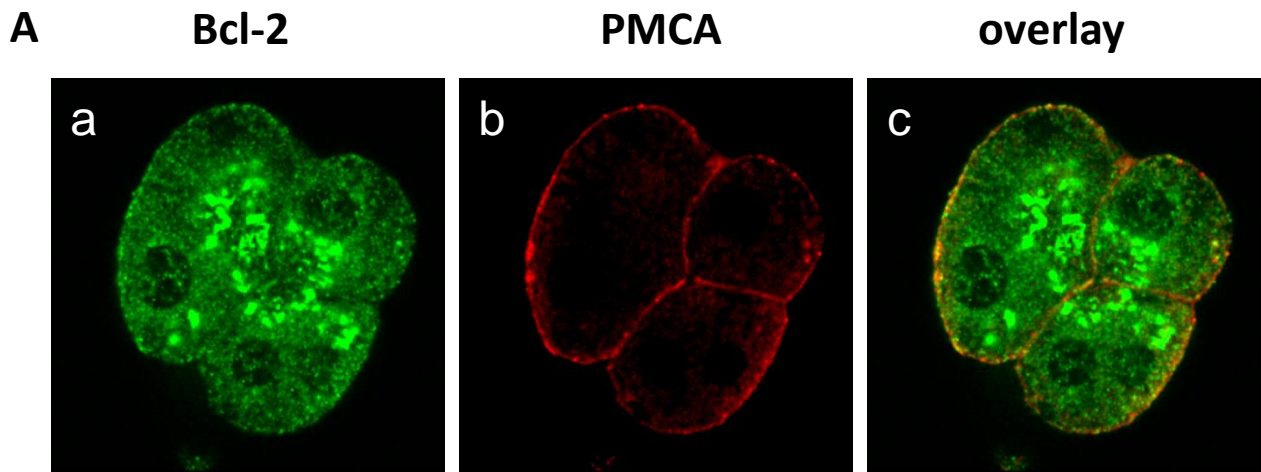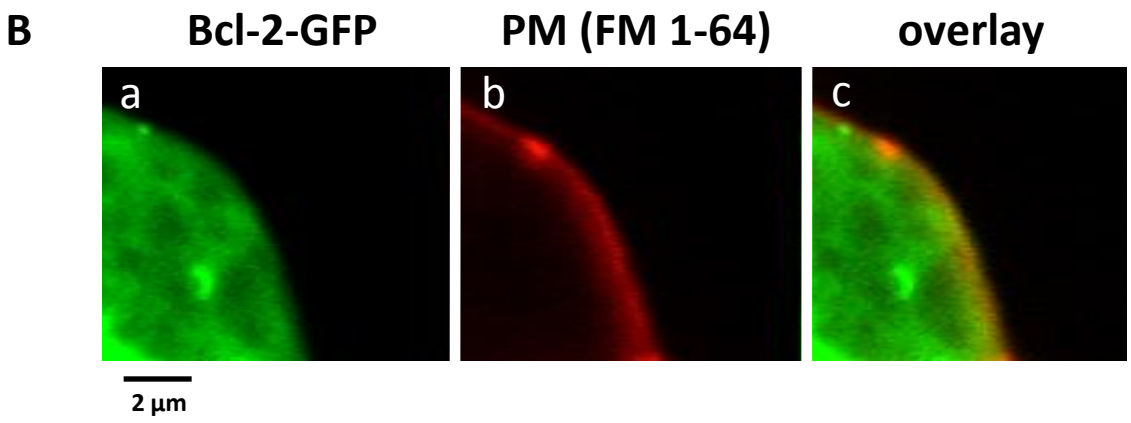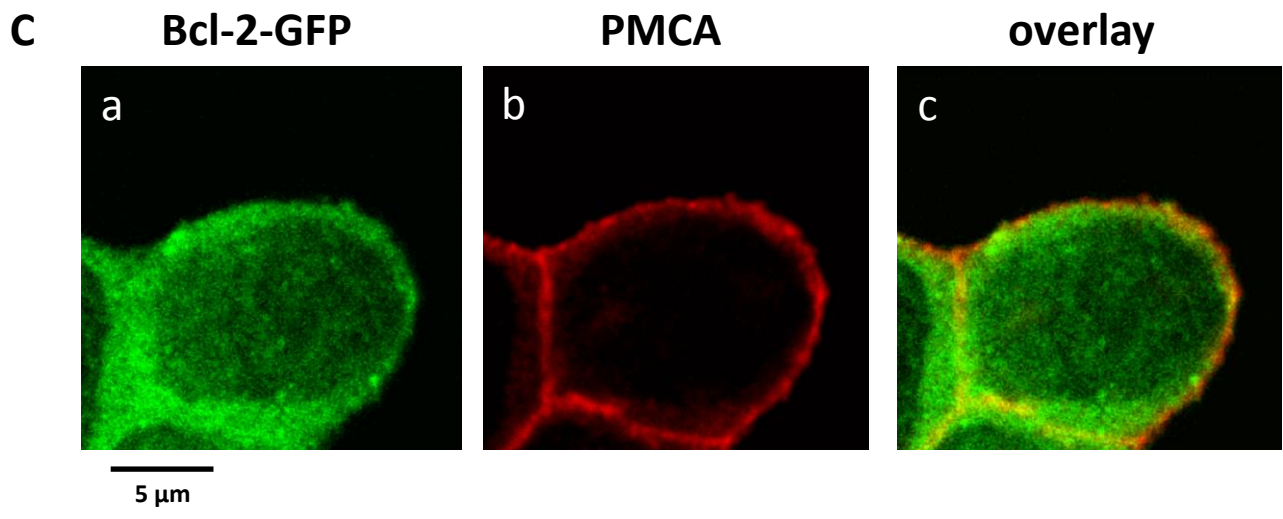

Supplement: mmc1.pdf [file mmc1.pdf]
